# Supplementary material for: Radiation grafting of vinyl ether of monoethanolamine on polypropylene films for application in waste water treatmentElectronic supplementary information (ESI) available: figures showing the dependence of the extent of grafting and water uptake on hexane content in the feed mixture at different absorbed doses. See http://www.rsc.org/suppdata/jm/b2/b202689a/
Source: Royal Society of Chemistry journal article supplement (doi:10.1039/b202689a), 2002-07-08
Supplement: b202689a.doc [file b202689a.doc]

# Electronic supplementary information


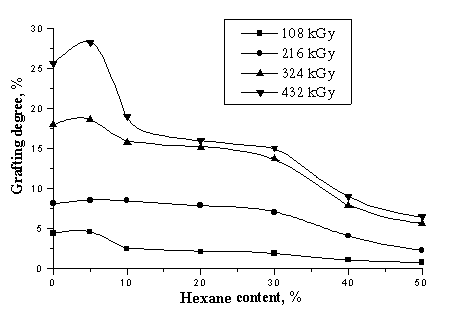


Dependence of the grafting degree on hexane content in the feed mixture at different absorbed doses.

###### ESI-1


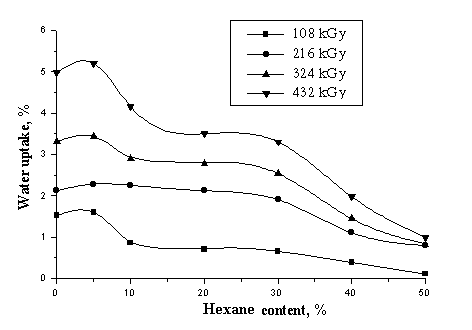


Dependence of water uptake of grafted films on hexane content in

the feed mixture at different absorbed doses

ESI-2
